# Supplementary material for: Chromosome-scale genome assembly for the duckweed Spirodela intermedia, integrating cytogenetic maps, PacBio and Oxford Nanopore libraries
Source: PubMed Central journal article supplement (PMC7645714; doi:10.1038/s41598-020-75728-9), 2020-11-05
Supplement: 41598_2020_75728_MOESM1_ESM.pdf [file 41598_2020_75728_MOESM1_ESM.pdf]

# Chromosome-scale genome assembly for the duckweed *Spirodela intermedia*, integrating cytogenetic maps, PacBio and Oxford Nanopore libraries

Phuong TN Hoang<sup>1,2,+</sup>, Anne Fiebig<sup>1,+</sup>, Petr Novák<sup>3</sup>, Jiří Macas<sup>3</sup>, Hieu X Cao<sup>1,4</sup>, Anton Stepanenko<sup>5,6</sup>, Guimin Chen<sup>5,6</sup>, Nikolai Borisjuk<sup>5,6</sup>, Uwe Scholz<sup>1</sup>, Ingo Schubert<sup>1\*</sup>

<sup>1</sup> Leibniz Institute of Plant Genetics and Crop Plant Research (IPK), Gatersleben, D-06466 Stadt Seeland, Germany

<sup>2</sup> permanent address: Biology Faculty, Dalat University, District 8, Dalat City, Lamdong Province, Vietnam

<sup>3</sup> Biology Centre, Czech Academy of Sciences, Institute of Plant Molecular Biology, České Budějovice, CZ-37005 Czech Republic

<sup>4</sup> present address: Martin-Luther-University Halle-Wittenberg, Institute of Biology, D-06120, Germany

<sup>5</sup> Jiangsu Key Laboratory for Eco-Agricultural Biotechnology around Hongze Lake, School of Life Sciences, Huaiyin Normal University, Huai'an, 223300, China

<sup>6</sup> Jiangsu Collaborative Innovation Centre of Regional Modern Agriculture & Environmental Protection, Huaiyin Normal University, Huai'an, 223300, China

+These authors contributed equally to this work

\* Corresponding author: [schubert@ipk-gatersleben.de](mailto:schubert@ipk-gatersleben.de), Tel: +49 394825239

IS: ORCID ID 0000-0002-6300-2068; AF: ORCID ID 0000-0003-3159-3593; US: ORCID ID 0000-0001-6113-3518; HC: ORCID ID 0000-0003-1230-4127; PTNH: ORCID ID 0000-0002-7418-9091; AS: ORCID ID 0000-0003-2326-6613; NB: ORCID ID 0000-0001-5250-9771; JM: ORCID ID [0000-0003-0829-1570](https://orcid.org/0000-0003-0829-1570); PN: ORCID ID 0000-0002-5068-9681;

**Table S1: Statistics of gene prediction and functional annotation**

|                                     | <i>S. intermedia</i><br>clone 7747 | <i>S. intermedia</i><br>clone 8410 | <i>S. polyrhiza</i><br>clone 9509 <sup>a</sup> |
|-------------------------------------|------------------------------------|------------------------------------|------------------------------------------------|
| Total number of gene models         | 22,245                             | 21,594                             | 20,659                                         |
| 3' truncated genes                  | 38                                 | 8                                  | 149                                            |
| 5' truncated genes                  | 2,981                              | 327                                | 3,350                                          |
| Internal stop codons                | 1                                  | 0                                  | 277                                            |
| Number of coding transcripts        | 22,116                             | 21,546                             | 16,877                                         |
| Proteins with functional annotation | 15,754                             | 15,558                             | 12,352                                         |
| Protein coding genes with GO terms  | 11,166                             | 10,234                             | 8,398                                          |
| Protein coding genes with eggNOG    | 16,162                             | 16,493                             | 11,327                                         |
| Proteins with Pfam annotation       | 15,908                             | 15,165                             | 8,302                                          |

a) data taken from Michael et al., (2017)<sup>25</sup>

**Table S2: Number of genes associated with eggNOG functional categories**

| eggNOG category                              | <i>S. intermedia</i><br>7747 | <i>S. intermedia</i><br>8410 | <i>S. polyrhiza</i><br>9509 |
|----------------------------------------------|------------------------------|------------------------------|-----------------------------|
| <b>CELLULAR PROCESSES AND SIGNALING</b>      |                              |                              |                             |
| [D] Cell cycle control, cell division,       | 268 (1.6%)                   | 362 (2.0%)                   | 199 (1.7%)                  |
| [M] Cell wall/membrane/envelope biogenesis   | 249 (1.5%)                   | 224 (1.3%)                   | 189 (1.6%)                  |
| [N] Cell motility                            | 2 (0.0%)                     | 2 (0.0%)                     | 2 (0.0%)                    |
| [O] Post-translational modification, protein | 1507 (9.0%)                  | 1511 (8.6%)                  | 1069 (9.1%)                 |
| [T] Signal transduction mechanisms           | 1523 (9.1%)                  | 1523 (8.6%)                  | 1065 (9.0%)                 |
| [U] Intracellular trafficking, secretion and | 651 (3.9%)                   | 600 (3.4%)                   | 486 (4.1%)                  |
| [V] Defense mechanisms                       | 133 (0.8%)                   | 143 (0.8%)                   | 82 (0.7%)                   |
| [W] Extracellular structures                 | 56 (0.3%)                    | 43 (0.2%)                    | 41 (0.3%)                   |
| [Y] Nuclear structure                        | 40 (0.2%)                    | 37 (0.2%)                    | 37 (0.3%)                   |
| [Z] Cytoskeleton                             | 225 (1.3%)                   | 235 (1.3%)                   | 190 (1.6%)                  |
| <b>INFORMATION STORAGE AND PROCESSING</b>    |                              |                              |                             |
| [A] RNA processing and modification          | 521 (3.1%)                   | 693 (3.9%)                   | 415 (3.5%)                  |
| [B] Chromatin structure and dynamics         | 156 (0.9%)                   | 193 (1.1%)                   | 116 (1.0%)                  |
| [J] Translation, ribosomal structure and     | 626 (3.7%)                   | 723 (4.1%)                   | 430 (3.6%)                  |
| [K] Transcription                            | 1466 (8.7%)                  | 1478 (8.4%)                  | 1068 (9.1%)                 |
| [L] Replication, recombination and repair    | 535 (3.2%)                   | 935 (5.3%)                   | 275 (2.3%)                  |
| <b>METABOLISM</b>                            |                              |                              |                             |
| [C] Energy production and conversion         | 698 (4.2%)                   | 540 (3.1%)                   | 308 (2.6%)                  |
| [E] Amino acid transport and metabolism      | 435 (2.6%)                   | 537 (3.0%)                   | 306 (2.6%)                  |
| [F] Nucleotide transport and metabolism      | 134 (0.8%)                   | 144 (0.8%)                   | 114 (1.0%)                  |
| [G] Carbohydrate transport and metabolism    | 962 (5.7%)                   | 993 (5.6%)                   | 674 (5.7%)                  |
| [H] Coenzyme transport and metabolism        | 199 (1.2%)                   | 202 (1.1%)                   | 155 (1.3%)                  |
| [I] Lipid transport and metabolism           | 470 (2.8%)                   | 511 (2.9%)                   | 348 (2.9%)                  |
| [P] Inorganic ion transport and metabolism   | 431 (2.6%)                   | 394 (2.2%)                   | 338 (2.9%)                  |
| [Q] Secondary metabolites biosynthesis,      | 529 (3.1%)                   | 556 (3.1%)                   | 387 (3.3%)                  |
| <b>POORLY CHARACTERIZED</b>                  |                              |                              |                             |
| [S] Function unknown                         | 4992 (29.7%)                 | 5080 (28.8%)                 | 3503 (29.7%)                |

**Table S3: Average similarity, length and chromosomal assignment of whole BAC sequences from *S. polyrhiza* on *S. intermedia* assemblies from PacBio (clone 7747) and Hybrid ON/Illumina (clone 8410)**

| BAC     | Sp9509 (ON)  | Si7747 (PacBio) |            |        | Si8410 (Hybrid ON/Illumina) |            |        |
|---------|--------------|-----------------|------------|--------|-----------------------------|------------|--------|
|         | ChrSp (=gi ) | ChrSi_7747      | Ave. simil | length | ChrSi_8410                  | Ave. simil | length |
| 030D21  | gi 1         | Si01            | 87,46      | 60112  | jcf159735_S01               | 87,61      | 59666  |
| 014L22  | gi 1         | Si01            | 87,12      | 81806  | jcf159735_S01               | 87,15      | 88220  |
| 019A13  | gi 1         | Si01            | 87,1       | 59976  | jcf159735_S01               | 87,17      | 60103  |
| 012O14  | gi 1         | Si01            | 85,08      | 46416  | jcf159735_S01               | 85,16      | 47916  |
| 032E03. | gi 1         | Si01            | 86,56      | 45578  | jcf159735_S01               | 86,17      | 48318  |
| 003D17  | gi 1         | Si01            | 85,91      | 50373  | jcf159735_S01               | 85,75      | 51344  |
| 004D21  | gi 2         | Si02            | 86,27      | 53252  | jcf159572_S02               | 86,3       | 58720  |
| 005N05  | gi 2         | Si02            | 86,53      | 74035  | jcf159572_S02               | 97,39      | 67910  |
| 037B02  | gi 2         | Si02            | 87,35      | 68814  | jcf159572_S02               | 87,64      | 69089  |
| 003H12  | gi 2         | Si02            | 84,25      | 30588  | jcf159572_S02               | 84,72      | 28285  |
| 021D24  | gi 3         | Si04            | 85,37      | 52775  | jcf159718_S04               | 85,57      | 52789  |
| 002E10. | gi 3         | Si04            | 84,9       | 50015  | jcf159718_S04               | 86,81      | 38546  |
| 002K06  | gi 3         | Si03            | 85,95      | 83901  | jcf159755_S03               | 85,88      | 79771  |
| 011P20  | gi 3         | Si03            | 88,53      | 20882  | jcf159755_S03               | 87,47      | 20336  |
| 010J02  | gi 3         | Si03            | 85,25      | 53304  | jcf159755_S03               | 85         | 52948  |
| 006F09  | gi 4         | Si05            | 85,98      | 37528  | jcf159694_S05               | 89,95      | 39275  |
| 013D18  | gi 4         | Si05            | 86,16      | 32980  | jcf159694_S05               | 85,93      | 35398  |
| 035L13  | gi 4         | Si05            | 85,91      | 71580  | jcf159694_S05               | 85,59      | 75905  |
| 017E03. | gi 4         | Si05            | 85,49      | 49432  | jcf159694_S05               | 85,82      | 46564  |
| 030K22  | gi 5         | Si06            | 83,8       | 35963  | jcf159561_S06_3             | 84,25      | 35725  |
| 027D17  | gi 5         | Si06            | 85,39      | 27060  | jcf159561_S06_3             | 85,17      | 28765  |
| 009A15  | gi 5         | Si06            | 85         | 53927  | jcf159561_S06_3             | 85,67      | 45060  |
| 009O20  | gi 5         | Si06            | 85,77      | 54215  | jcf159561_S06_3             | 86,46      | 59510  |
| 023I01  | gi 6         | Si06            | 86,17      | 45086  | jcf159561_S06_3             | 86,13      | 45287  |
| 033A10  | gi 6         | Si06            | 83,85      | 116778 | jcf159633_S07               | 83,35      | 5641   |
| 002I04  | gi 6         | Si07            | 85,72      | 39814  | jcf159633_S07               | 86,06      | 38432  |
| 026N01  | gi 6         | Si07            | 85         | 42591  | jcf159633_S07               | 85,31      | 42343  |
| 035L19  | gi 6         | Si03            | 86,39      | 9519   | jcf159755_S03               | 86,41      | 9518   |
| 014F03  | gi 7         | Si07            | 83,47      | 26249  | jcf159633_S07               | 84,43      | 24575  |
| 035P21  | gi 7         | Si07            | 85,98      | 42029  | jcf159633_S07               | 85,94      | 45303  |
| 004A04  | gi 7         | Si08            | 84,86      | 42563  | jcf159638_S08               | 85,42      | 41477  |
| 030B11  | gi 7         | Si08            | 86,29      | 37369  | jcf159638_S08               | 86,93      | 39912  |

|         |       |      |       |       |               |         |       |
|---------|-------|------|-------|-------|---------------|---------|-------|
| 013I04  | gi 8  | Si09 | 86,95 | 54696 | jcf159258_S09 | 86,3    | 61589 |
| 006P24  | gi 8  | Si09 | 84,6  | 22078 | jcf159258_S09 | 84,57   | 21724 |
| 032L08  | gi 8  | Si09 | 86,25 | 67943 | jcf159258_S09 | 86,17   | 73293 |
| 034K03  | gi 8  | Si09 | 86    | 76355 | jcf159258_S09 | 86,22   | 77363 |
| 004E01. | gi 8  | Si09 | 84,2  | 30708 | jcf159258_S09 | 84,63   | 30343 |
| 006L17  | gi 8  | Si09 | 84,74 | 59271 | jcf159258_S09 | 85,1    | 59976 |
| 037H06  | gi 9  | Si10 | 85,94 | 84892 | jcf159563_S10 | 85,96   | 81218 |
| 025O16  | gi 9  | Si10 | 85,68 | 59148 | jcf159563_S10 | 85,85   | 58340 |
| 019G12  | gi 9  | Si10 | 86,05 | 30432 | jcf159563_S10 | 85,77   | 44605 |
| 024C02  | gi 9  | Si10 | 85,63 | 65769 | jcf159563_S10 | 85,7    | 64611 |
| 036C07  | gi 9  | Si10 | 86,17 | 69591 | jcf159563_S10 | 86,33   | 71742 |
| 001D13  | gi 9  | Si10 | 84,51 | 31843 | jcf159563_S10 | 84,35   | 38379 |
| 035P14  | gi 10 | Si11 | 84,88 | 33727 | jcf159580_S11 | 85,03   | 37048 |
| 002B12  | gi 10 | Si11 | 85,33 | 51252 | jcf159580_S11 | 85,39   | 64004 |
| 037K21  | gi 10 | Si11 | 86,68 | 44661 | jcf159580_S11 | 86,4    | 53612 |
| 008G11  | gi 10 | Si11 | 83,42 | 40388 | jcf159580_S11 | 84,1    | 40591 |
| 020G09  | gi 10 | Si12 | 85,73 | 50729 | jcf159635_S12 | 85,77   | 43981 |
| 028B20  | gi 10 | Si12 | 84,89 | 45472 | jcf159635_S12 | 84,95   | 47152 |
| 026G16  | gi 10 | Si12 | 86,92 | 55062 | jcf159635_S12 | 87,03   | 52791 |
| 019I03  | gi 11 | Si13 | 86,83 | 56535 | jcf159540_S13 | 86,8    | 56717 |
| 010P10  | gi 11 | Si13 | 85,3  | 34147 | jcf159540_S13 | 85,82   | 34902 |
| 004G03  | gi 11 | Si13 | 84,37 | 33178 | jcf159540_S13 | 83,87   | 36537 |
| 011L15  | gi 11 | Si13 | 87,11 | 39402 | jcf159540_S13 | 83,87   | 36537 |
| 001C15  | gi 11 | Si13 | 86,66 | 67380 | jcf159540_S13 | 86,89   | 65754 |
| 028L12  | gi 12 | Si14 | 86,43 | 27269 | jcf159533_S14 | 86,5525 | 27264 |
| 035F17  | gi 12 | Si14 | 86,53 | 74050 | jcf159533_S14 | 86,36   | 82780 |
| 030D24  | gi 12 | Si14 | 84,89 | 26996 | jcf159533_S14 | 88,6    | 29763 |
| 010L16  | gi 13 | Si15 | 86,95 | 57898 | jcf159593_S15 | 86,07   | 69048 |
| 008B06  | gi 13 | Si15 | 83,88 | 19711 | jcf159593_S15 | 84,19   | 20862 |
| 031B15  | gi 13 | Si15 | 84,76 | 35280 | jcf159593_S15 | 85,19   | 36491 |
| 020L20  | gi 13 | Si15 | 86,1  | 60590 | jcf159593_S15 | 86,1    | 63574 |
| 003B08  | gi 14 | Si07 | 84,94 | 68038 | jcf159633_S07 | 86,1    | 69838 |
| 036F14  | gi 14 | Si07 | 86,23 | 57142 | jcf159633_S07 | 86,51   | 53981 |
| 040G15  | gi 14 | Si07 | 85    | 71317 | jcf159633_S07 | 85,2    | 72711 |
| 037I18  | gi 14 | Si03 | 85,5  | 22859 | jcf159755_S03 | 85,34   | 25230 |
| 006D12  | gi 14 | Si03 | 84,21 | 42787 | jcf159755_S03 | 84,54   | 29381 |
| 011C23  | gi 15 | Si16 | 80    | 19792 | jcf159680_S16 | 79      | 25137 |

|         |       |      |       |        |               |       |        |
|---------|-------|------|-------|--------|---------------|-------|--------|
| 021P03  | gi 15 | Si16 | 87    | 28053  | jcf159680_S16 | 86,22 | 33699  |
| 020E12. | gi 15 | Si16 | 84,13 | 67518  | jcf159680_S16 | 84,68 | 71876  |
| 035L20  | gi 15 | Si16 | 85    | 26169  | jcf159680_S16 | 84,68 | 32086  |
| 009J15  | gi 16 | Si11 | 85,4  | 57130  | jcf159580_S11 | 85,8  | 57445  |
| 002L10  | gi 16 | Si11 | 84,89 | 14497  | jcf159580_S11 | 84,46 | 36142  |
| 009O07  | gi 17 | Si04 | 86,52 | 30662  | jcf159718_S04 | 87,82 | 47243  |
| 004N06  | gi 17 | Si04 | 82,02 | 177344 | jcf159718_S04 | 84,63 | 116454 |
| 009L02  | gi 17 | Si04 | 85,86 | 59364  | jcf159718_S04 | 85,92 | 52240  |
| 037B13  | gi 18 | Si09 | 86,57 | 39229  | jcf159258_S09 | 87,1  | 36333  |
| 029K19  | gi 18 | Si09 | 86,27 | 37344  | jcf159258_S09 | 86,1  | 41667  |
| 015L03  | gi 19 | Si17 | 80,5  | 23281  | jcf159710_S17 | 80,3  | 43506  |
| 015J20  | gi 19 | Si17 | 83,1  | 74308  | jcf159710_S17 | 83,2  | 46935  |
| 037H19  | gi 19 | Si17 | 85,4  | 47128  | jcf159710_S17 | 85,29 | 55129  |
| 008A12  | gi 19 | Si17 | 88,35 | 309    | jcf159710_S17 | 88,39 | 310    |
| 006C19  | gi 20 | Si18 | 86,5  | 67472  | jcf159617_S18 | 86,1  | 67065  |
| 007A03  | gi 20 | Si18 | 87,22 | 94416  | jcf159617_S18 | 86,1  | 95006  |
| 013O04  | gi 20 | Si16 | 80,4  | 166821 | jcf159680_S16 | 80,3  | 76462  |

**Table S4: BLAST data of whole BAC sequences (029A10, 028116 and 037J09) against assemblies for *S. polyrhiza* clones 7498 (Cao et al., 2016) and 9509 (Michael et al., 2017)**

| BAC    | Sp7498 assembly |        |        |         |         |         |         | Sp9509 assembly |        |        |        |        |         |         |
|--------|-----------------|--------|--------|---------|---------|---------|---------|-----------------|--------|--------|--------|--------|---------|---------|
|        | sseqid          | pident | length | qstart  | qend    | sstart  | send    | sseqid          | pident | length | qstart | qend   | sstart  | send    |
| 029A10 | pseudo1         | 99.53  | 22983  | 68796   | 91756   | 5822175 | 5799227 | CP019095.1      | 99.62  | 22173  | 118016 | 140148 | 5754022 | 5731861 |
|        |                 | 99.73  | 19450  | 91701   | 111136  | 5798870 | 5779431 |                 | 99.67  | 7259   | 110726 | 117974 | 5761320 | 5754063 |
|        |                 | 99.41  | 16845  | 1       | 16811   | 5891712 | 5874872 |                 | 99.81  | 8457   | 102185 | 110637 | 5769858 | 5761406 |
|        |                 | 99.44  | 15999  | 47861   | 63838   | 5843071 | 5827104 |                 | 99.71  | 25957  | 76217  | 102154 | 5795842 | 5769889 |
|        |                 | 99.72  | 13817  | 111090  | 124885  | 5779242 | 5765428 |                 | 99.66  | 8635   | 67463  | 76079  | 5804617 | 5795983 |
|        |                 | 99.44  | 13126  | 23910   | 37014   | 5867460 | 5854348 |                 | 98.44  | 2812   | 64625  | 67430  | 5807531 | 5804728 |
|        |                 | 99.49  | 6476   | 41412   | 47887   | 5849805 | 5843358 |                 | 99.48  | 7465   | 57275  | 64735  | 5814834 | 5807380 |
|        |                 | 99.57  | 5640   | 128685  | 134314  | 5760759 | 5755130 |                 | 99.74  | 5039   | 52166  | 57202  | 5819952 | 5814919 |
|        |                 | 99.69  | 4789   | 16742   | 21528   | 5874847 | 5870060 |                 | 99.76  | 1691   | 50392  | 52081  | 5821718 | 5820028 |
|        |                 | 99.16  | 4414   | 36977   | 41378   | 5854226 | 5849828 |                 | 99.50  | 8912   | 41410  | 50312  | 5830711 | 5821829 |
|        |                 | 98.61  | 3964   | 64729   | 68670   | 5826171 | 5822215 |                 | 99.82  | 2811   | 38560  | 41370  | 5833540 | 5830732 |
|        |                 | 99.63  | 2731   | 137420  | 140148  | 5751910 | 5749185 |                 | 98.21  | 1728   | 35258  | 36971  | 5836919 | 5835201 |
|        |                 | 99.63  | 2424   | 21531   | 23951   | 5869905 | 5867484 |                 | 99.74  | 12742  | 22467  | 35207  | 5849697 | 5836970 |
|        |                 | 99.61  | 2075   | 126653  | 128723  | 5763620 | 5761548 |                 | 99.85  | 21478  | 1      | 21476  | 5872187 | 5850713 |
| 99.10  | 1991            | 135482 | 137470 | 5754028 | 5752050 |         |         |                 |        |        |        |        |         |         |
|        |                 |        |        |         |         |         |         |                 |        |        |        |        |         |         |
| 028116 | pseudo1         | 99.59  | 24197  | 19758   | 43939   | 5446478 | 5422300 | CP019095.1      | 99.61  | 46314  | 73255  | 119503 | 5284597 | 5238337 |
|        |                 | 99.35  | 12352  | 44831   | 57169   | 5420842 | 5408501 |                 | 99.86  | 2933   | 84400  | 87331  | 5368531 | 5365600 |
|        |                 | 98.75  | 11240  | 72780   | 83999   | 5395318 | 5384128 |                 | 98.85  | 6181   | 77798  | 83969  | 5375172 | 5369018 |
|        |                 | 99.44  | 6081   | 13707   | 19784   | 5452735 | 5446667 |                 | 99.73  | 3745   | 73028  | 76766  | 5379992 | 5376248 |
|        |                 | 99.77  | 5730   | 3005    | 8729    | 5463838 | 5458112 |                 | 99.42  | 5312   | 66925  | 72213  | 5386154 | 5380843 |
|        |                 | 99.64  | 5582   | 66903   | 72480   | 5400918 | 5395339 |                 | 99.79  | 1881   | 64852  | 66732  | 5388291 | 5386412 |

|        |         |       |       |        |        |         |         |            |        |                                         |        |        |         |         |  |
|--------|---------|-------|-------|--------|--------|---------|---------|------------|--------|-----------------------------------------|--------|--------|---------|---------|--|
|        |         | 99.45 | 4361  | 9352   | 13707  | 5457181 | 5452830 |            | 99.09  | 4052                                    | 60074  | 64100  | 5396082 | 5392035 |  |
|        |         | 99.77 | 3031  | 1      | 3031   | 5467227 | 5464200 |            | 99.38  | 9140                                    | 50541  | 59676  | 5405666 | 5396538 |  |
|        |         | 99.28 | 2934  | 84399  | 87331  | 5383451 | 5380533 |            | 99.68  | 5554                                    | 44935  | 50483  | 5411269 | 5405722 |  |
|        |         | 99.36 | 2661  | 57169  | 59822  | 5408303 | 5405649 |            | 99.69  | 5829                                    | 38709  | 44529  | 5417618 | 5411795 |  |
|        |         | 96.94 | 687   | 8716   | 9402   | 5458170 | 5457498 |            | 99.75  | 13444                                   | 25037  | 38476  | 5431348 | 5417914 |  |
|        |         |       |       |        |        |         |         |            | 99.79  | 9377                                    | 15604  | 24979  | 5440783 | 5431409 |  |
|        |         |       |       |        |        |         |         |            | 99.04  | 1143                                    | 14399  | 15539  | 5441999 | 5440864 |  |
|        |         |       |       |        |        |         |         |            | 99.44  | 5008                                    | 8716   | 13711  | 5447729 | 5442727 |  |
|        |         |       |       |        |        |         |         |            | 99.68  | 8734                                    | 1      | 8729   | 5456401 | 5447671 |  |
|        |         |       |       |        |        |         |         |            |        |                                         |        |        |         |         |  |
|        |         |       |       |        |        |         |         |            |        |                                         |        |        |         |         |  |
|        |         |       |       |        |        |         |         |            |        |                                         |        |        |         |         |  |
| 037109 | pseudo1 | 99.68 | 22753 | 107896 | 130634 | 5260327 | 5237617 |            | 99.82  | 5636                                    | 132201 | 137835 | 5222680 | 5217046 |  |
|        |         | 99.61 | 18693 | 28622  | 47292  | 5346162 | 5327484 |            | 99.74  | 10705                                   | 120518 | 131220 | 5234356 | 5223666 |  |
|        |         | 99.57 | 11934 | 8337   | 20263  | 5364343 | 5352425 |            | 97.71  | 2268                                    | 69628  | 71877  | 5288109 | 5285850 |  |
|        |         | 99.32 | 10980 | 89724  | 100672 | 5278776 | 5267803 |            | 99.83  | 10044                                   | 59797  | 69834  | 5297991 | 5287948 |  |
|        |         | 99.66 | 7641  | 62154  | 69788  | 5312112 | 5304473 |            | 98.29  | 2401                                    | 55331  | 57725  | 5302503 | 5300122 |  |
|        |         | 99.46 | 7222  | 130621 | 137835 | 5237591 | 5230376 |            | 99.38  | 7555                                    | 47340  | 54894  | 5310532 | 5303021 |  |
|        |         | 99.63 | 6147  | 20223  | 26359  | 5352325 | 5346183 | CP019095.1 | 99.36  | 4694                                    | 42535  | 47225  | 5315344 | 5310653 |  |
|        |         | 99.69 | 6052  | 79488  | 85532  | 5288615 | 5282568 |            | 99.19  | 3929                                    | 38822  | 42743  | 5319251 | 5315342 |  |
|        |         | 99.41 | 5428  | 1      | 5414   | 5373174 | 5367752 |            | 99.61  | 9682                                    | 28647  | 38324  | 5329400 | 5319727 |  |
|        |         | 99.86 | 4323  | 103574 | 107896 | 5264870 | 5260548 |            | 99.69  | 7414                                    | 21179  | 28590  | 5336957 | 5329556 |  |
|        |         | 99.37 | 3956  | 48408  | 52361  | 5326259 | 5322325 |            | 99.66  | 13713                                   | 7456   | 21145  | 5350686 | 5336985 |  |
|        |         | 99.26 | 3537  | 85703  | 89235  | 5282315 | 5278780 |            | 99.36  | 7445                                    | 1      | 7431   | 5358179 | 5350747 |  |
|        |         | 99.57 | 3058  | 74494  | 77544  | 5293937 | 5290881 |            |        |                                         |        |        |         |         |  |
|        |         | 99.89 | 2620  | 100651 | 103270 | 5267561 | 5264943 |            |        |                                         |        |        |         |         |  |
|        |         | 98.96 | 2681  | 5705   | 8369   | 5367163 | 5364484 |            |        |                                         |        |        |         |         |  |
|        |         | 99.64 | 2523  | 52310  | 54831  | 5321873 | 5319352 |            | sseqid | Subject Seq-id (ID of the database hit) |        |        |         |         |  |
|        |         | 98.84 | 2246  | 55326  | 57559  | 5318933 | 5316696 |            | pident | Percentage of identical matches         |        |        |         |         |  |



|  |  |        |      |       |       |         |         |  |        |                                              |  |  |  |  |  |
|--|--|--------|------|-------|-------|---------|---------|--|--------|----------------------------------------------|--|--|--|--|--|
|  |  | 99.53  | 2112 | 60048 | 62159 | 5314325 | 5312214 |  | length | Alignment length                             |  |  |  |  |  |
|  |  | 97.68  | 2203 | 69676 | 71853 | 5304636 | 5302439 |  | qstart | Start of alignment in query                  |  |  |  |  |  |
|  |  | 98.07  | 1662 | 58418 | 60068 | 5315977 | 5314333 |  | qend   | End of alignment in query                    |  |  |  |  |  |
|  |  | 99.11  | 447  | 47966 | 48410 | 5326679 | 5326233 |  | sstart | Start of alignment in subject (database hit) |  |  |  |  |  |
|  |  | 96.77  | 155  | 74343 | 74497 | 5294056 | 5293904 |  | send   | End of alignment in subject (database hit)   |  |  |  |  |  |
|  |  | 98.18  | 55   | 89444 | 89498 | 5968585 | 5968531 |  |        |                                              |  |  |  |  |  |
|  |  | 100.00 | 50   | 86637 | 86686 | 5281330 | 5281281 |  |        |                                              |  |  |  |  |  |
|  |  | 100.00 | 50   | 86686 | 86735 | 5281379 | 5281330 |  |        |                                              |  |  |  |  |  |
|  |  |        |      |       |       |         |         |  |        |                                              |  |  |  |  |  |
|  |  |        |      |       |       |         |         |  |        |                                              |  |  |  |  |  |

Fig. S1: DAPI-stained metaphase chromosome complements of *S. intermedia* clones 7747 and 8410 both showing 36 chromosomes.

Scale bars: 5 $\mu$ m

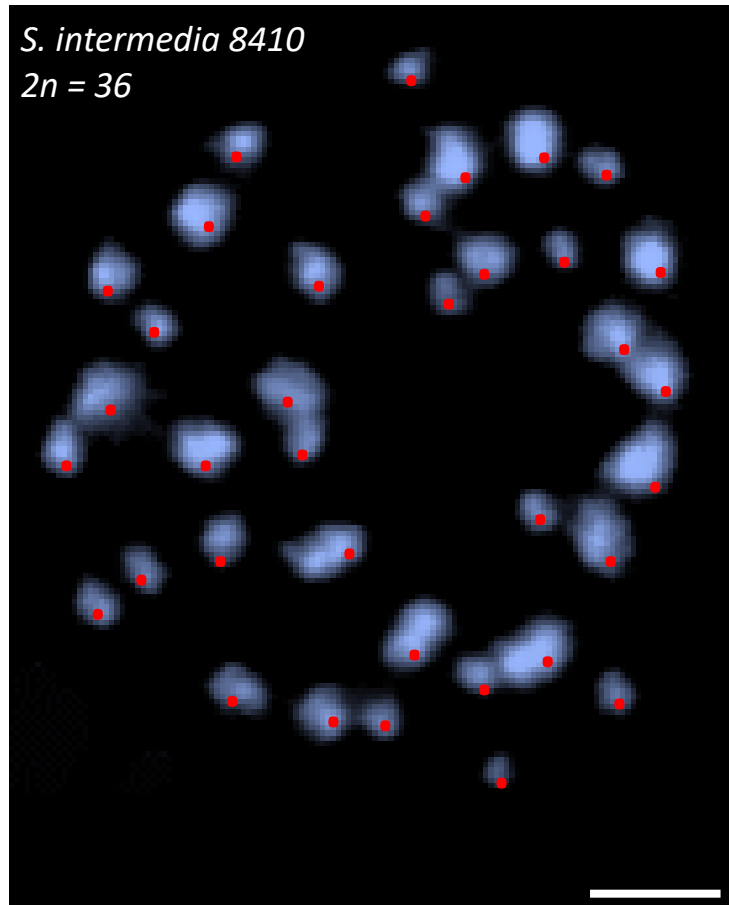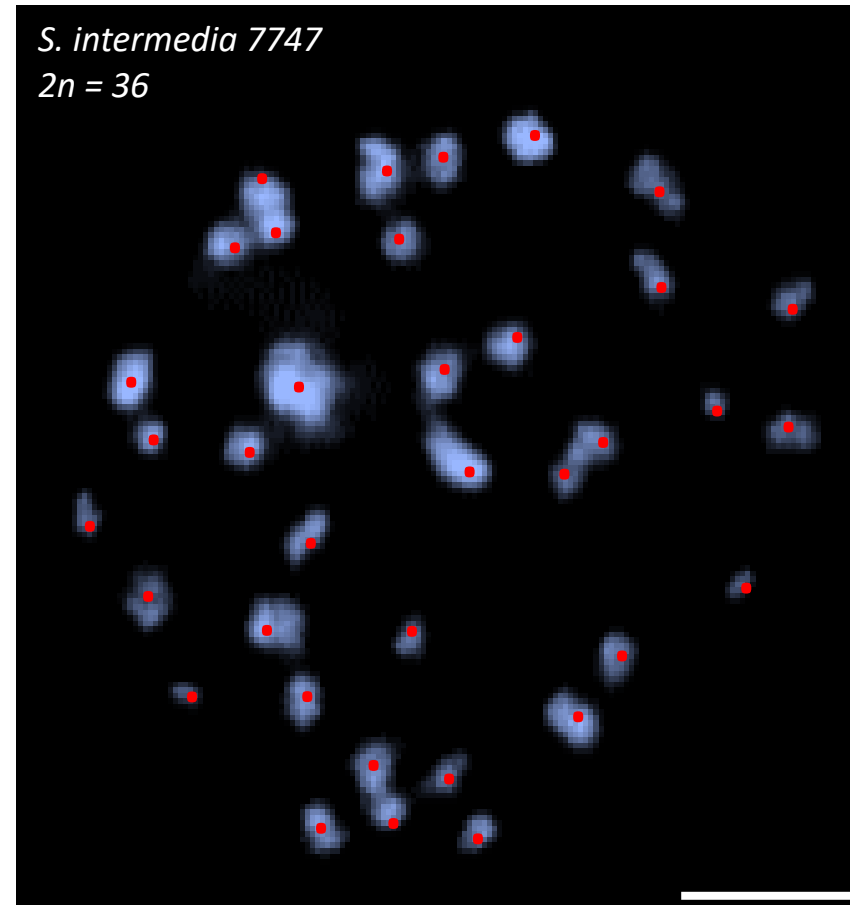

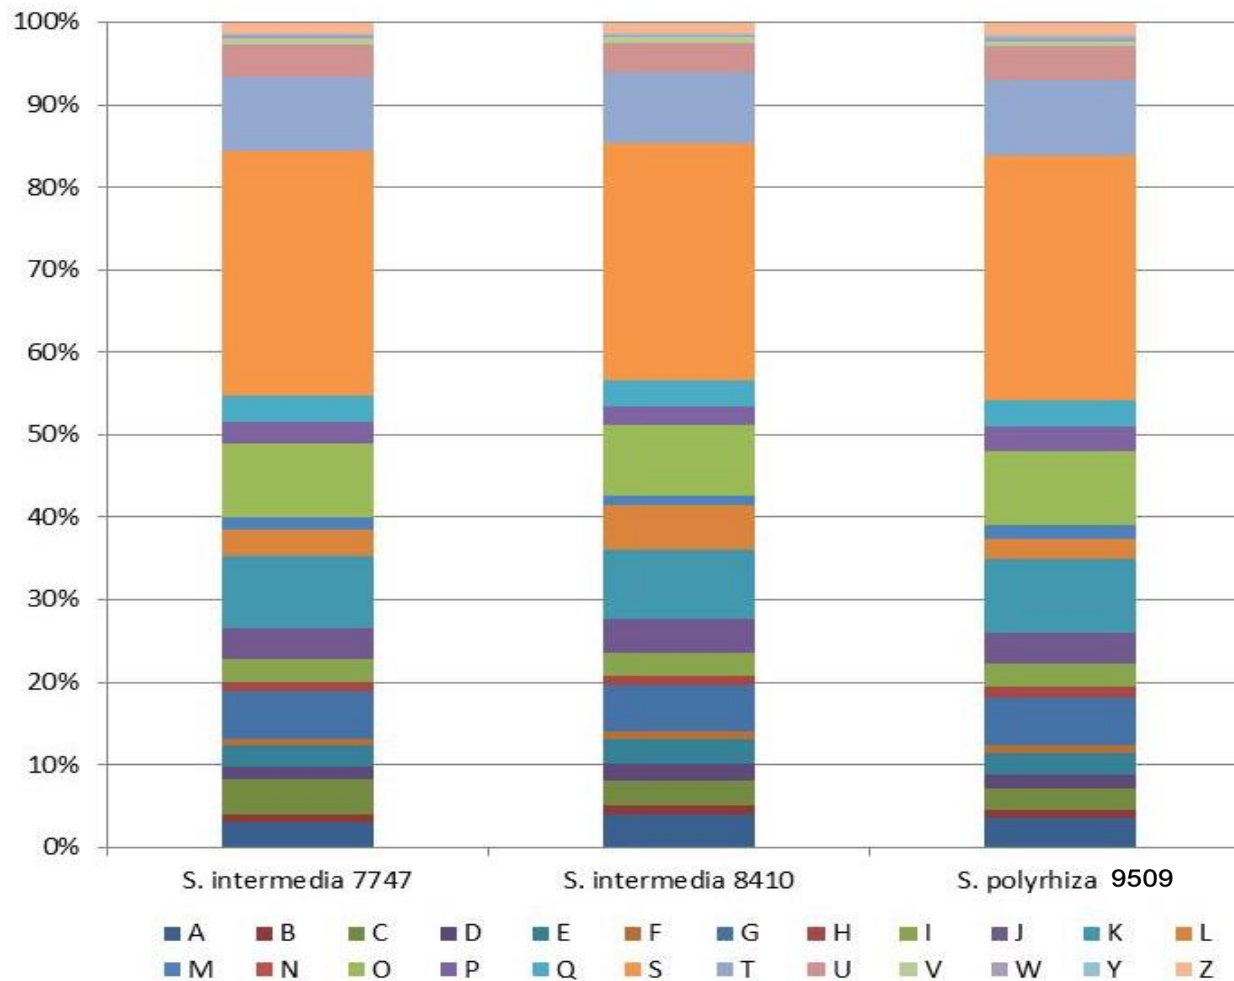

|   |                                       |   |                                                                        |
|---|---------------------------------------|---|------------------------------------------------------------------------|
| A | RNA processing and modification       | M | Cell wall/membrane/envelop biogenesis                                  |
| B | Chromatin Structure and dynamics      | N | Cell motility                                                          |
| C | Energy production and conversion      | O | Post-translational modification, protein turnover, chaperone functions |
| D | Cell cycle control and mitosis        | P | Inorganic ion transport and metabolism                                 |
| E | Amino Acid metabolism and transport   | Q | Secondary Structure                                                    |
| F | Nucleotide metabolism and transport   | S | Function Unknown                                                       |
| G | Carbohydrate metabolism and transport | T | Signal Transduction                                                    |
| H | Coenzyme metabolism                   | U | Intracellular trafficking and secretion                                |
| I | Lipid metabolism                      | V | Defense mechanisms                                                     |
| J | Translation                           | W | Extracellular structures                                               |
| K | Transcription                         | Y | Nuclear structure                                                      |
| L | Replication and repair                | Z | Cytoskeleton                                                           |

Fig. S2: Percental distribution of genes associated with eggNOG functional categories within three *Spirodela* genomes.

Fig. S3: Conserved location of 5S and 45S rDNA on *S. intermedia* clones 8410 and 7747. (a) 5S rDNA is located on ChrSi 15 (corresponding to ChrSp 13) (b) 45S rDNA is located on ChrSi 01 (corresponding to ChrSp 01); Scale bars = 5µm

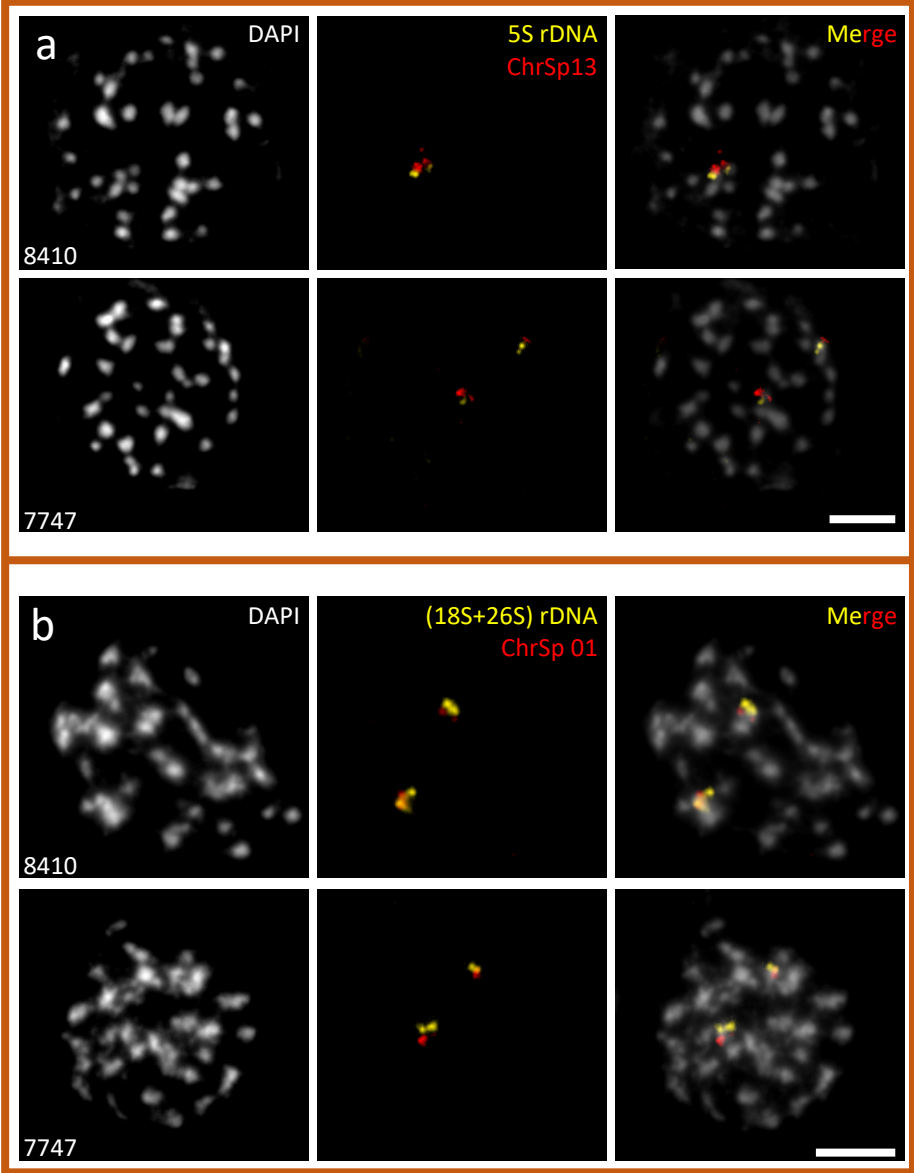

Fig. S4: Sequence alignment of two 5S rDNA units of *S. intermedia* clones 7747 and 8410. The 5S rRNA gene (in grey) is followed by the of non-transcribed spacer.

```

7747-1  qqqtqcgatcataccaqcaactaatqcaccqgataccatcaqaactccqaagttaaqcqtq
8410-1  qqqtqcgatcataccaqcaactaatqcaccqgataccatcaqaactccqaagttaaqcqtq
7747-2  qqqtqcgatcataccaqcaactaatqcaccqgataccatcaqaactccqaagttaaqcqtq
8410-2  qqqtqcgatcataccaqcaactaatqcaccqgataccatcaqaactccqaagttaaqcqtq
*****

7747-1  cttqqqcqagaqtagtactaqqatqqqqtqacctctctqgaaqtctctqgtttqaccccc
8410-1  cttqqqcqagaqtagtactaqqatqqqqtqacctctctqgaaqtctctqgtttqaccccc
7747-2  cttqqqcqagaqtagtactaqqatqqqqtqacctctctqgaaqtctctqgtttqaccccc
8410-2  cttqqqcqagaqtagtactaqqatqqqqtqacctctctqgaaqtctctqgtttqaccccc
*****

7747-1  ttcccccttttttqcttqttgc---ttqttqctqccqcgaaqtccqccacagaccaacc
8410-1  ttcccccttttttqcttqttgc---ttqttqctqccqcgaaqtccqccacagaccaacc
7747-2  ttcccccttttttqcttqttqcttqttqttqctqccqctqaaqtccqccaccqac-----
8410-2  ttcccccttttttqcttqcttqcttqttqttqctqccqctqaaqtccqccaccqac-----
*****.*.*****.****** ***** ***** ***** **

7747-1  cccatacctactatacctactaccctqtaqccqagccqacttctctqctccqctctct
8410-1  cccatacctactatacctactaccctqtaqccqagccqacttctctqctccqctctct
7747-2  -----ccccctacccttattaccctqtaqccqagccqacttctctqctccqctctct
8410-2  -----ccccctacccttattaccctqtaqccqagccqacttctctqctccqctctct
**.*.***.*.*.*****.*****.*****.****** ** *****

7747-1  ctacaqccqgqtttqtcqctacqaaqetaaqqacaaqccqaaqetaactaacttttcqqqaqt
8410-1  ctacaqccqgqtttqtcqctacqaaqetaaqqacaaqccqaaqetaactaacttttcqqqaqt
7747-2  ctacaqccqgqtttqtcqctacqaaqccaaqqacaaqtcqaaqetaactaacttttcqqqaqt
8410-2  ctacaqccqgqtttqtcqctacqaaqccaaqqacaaqtcqaaqetaactaacttttcqqqaqt
*****.*.*****.*.*****.*****.*****.*****.*****

7747-1  gtttogggcaegtttgggcgcttaggaagggactcgggaagacgggggcegcgcggttatgg
8410-1  gtttogggcaegtttgggcgcttaggaagggactcgggaagacgggggcegcgcggttatgg
7747-2  gtttogggcaegtttgggcgcttaggaaggg-ctcgggaagacgggggcegcgcggttatgg
8410-2  gtttogggcaegtttgggcgcttaggaaggg-ctcgggaagacgggggcegcgcggttatgg
***** *****

7747-1  gtgcggtgcgacctccccagcgcgagagccatctcgcatctgcgctgctcggaggggc
8410-1  gtgcggtgcgacctccccagcgcgagagccatctcgcatctgcgctgctcggaggggc
7747-2  gtgcggtgcgacctccccagcgcgagagccatctcgcatctgcgctgcttggg-gggc
8410-2  gtgcggtgcgacctccccagcgcgagagccatctcgcatctgcgctgctcggaggggc
*****.*** *****

7747-1  gtcagcctccctcctcgtgggtcgatcgtctcagggcccgcccgcccggttggega
8410-1  gtcagcctccctcctcgtgggtcgatcgtctcagggcccgcccgcccggttggega
7747-2  gtcagcctccctcctcaggggtcgatcgtctcagggcccgcccgcccggttggt-----
8410-2  gtcagcctccctcctcgtgggtcgatcgtctcagggcccgcccgcccggttggega
*****.*.*****.*****.*.***

7747-1  tggaggtggagggagagagcggggggagagaaatgagaccggaatggggcggaatgtgacatc
8410-1  tggaggtggagggagagagcggggggagagaaatgagaccggaatggggcggaatgtgacatc
7747-2  ---gatggagggagagagcggggggagagaaatgagaccggaatggggcggaatgtgacatc
8410-2  tggaggtggagggagagagcggggggagagaaatgagaccggaatggggcggaatgtgacatc
*.*.*****.*****.*****.*****.*****

```
